# Supplementary material
Source: PubMed Central journal article supplement (PMC5502710)
Supplement: NIHMS874421-supplement.pdf [file NIHMS874421-supplement.pdf]

Fig S1 Related to Figure 2

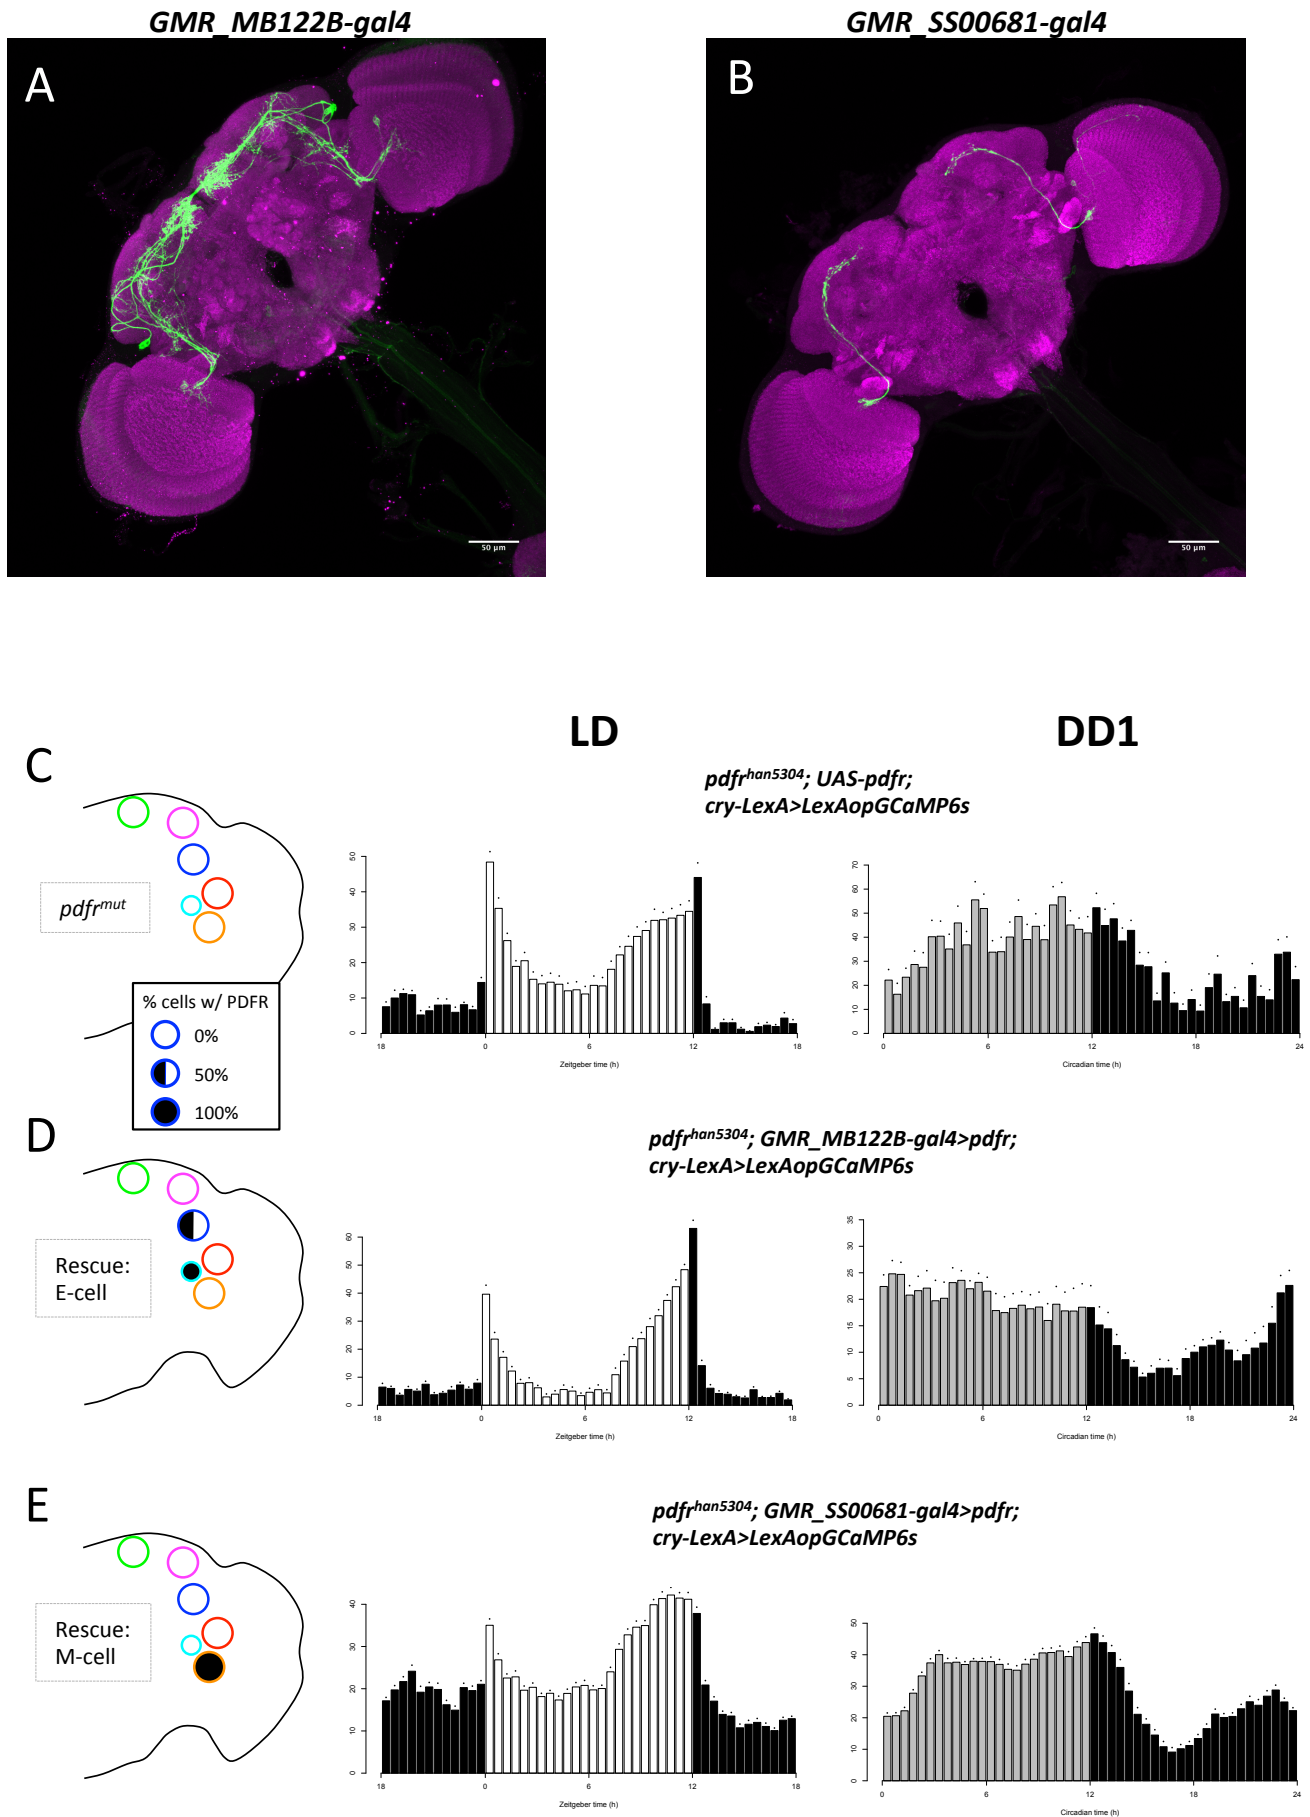

**Figure S1. Restoring PDFR in E pacemakers partially rescued the evening behavioral phase in *pdfr* mutants.** Related to Figure 2.

(A-B) The expression patterns of (A) MB122B-GAL4 and (B) SS00681-GAL4. The maximum intensity projections of 20x confocal stacks; the reference pattern is anti-Brp and the split-GAL4 pattern was visualized using a membrane targeted marker

( pJFRC225-5XUAS-IVS-myr::smGFP-FLAG). More detailed characterization of these lines will be presented in: H. Dionne, G. Rubin and A. Nern (in preparation).

(C-E) Average locomotor activity in the same genotypes which are used for imaging in Figure 2 B-D under LD cycles (left) and in first day under DD (right); also see Table S1. Restoring PDFR in M pacemakers did not provide such rescue. These results confirm previously published work by Lear et al. (2009) and by Im and Taghert (2010).

Fig S2. Related to Figure 4

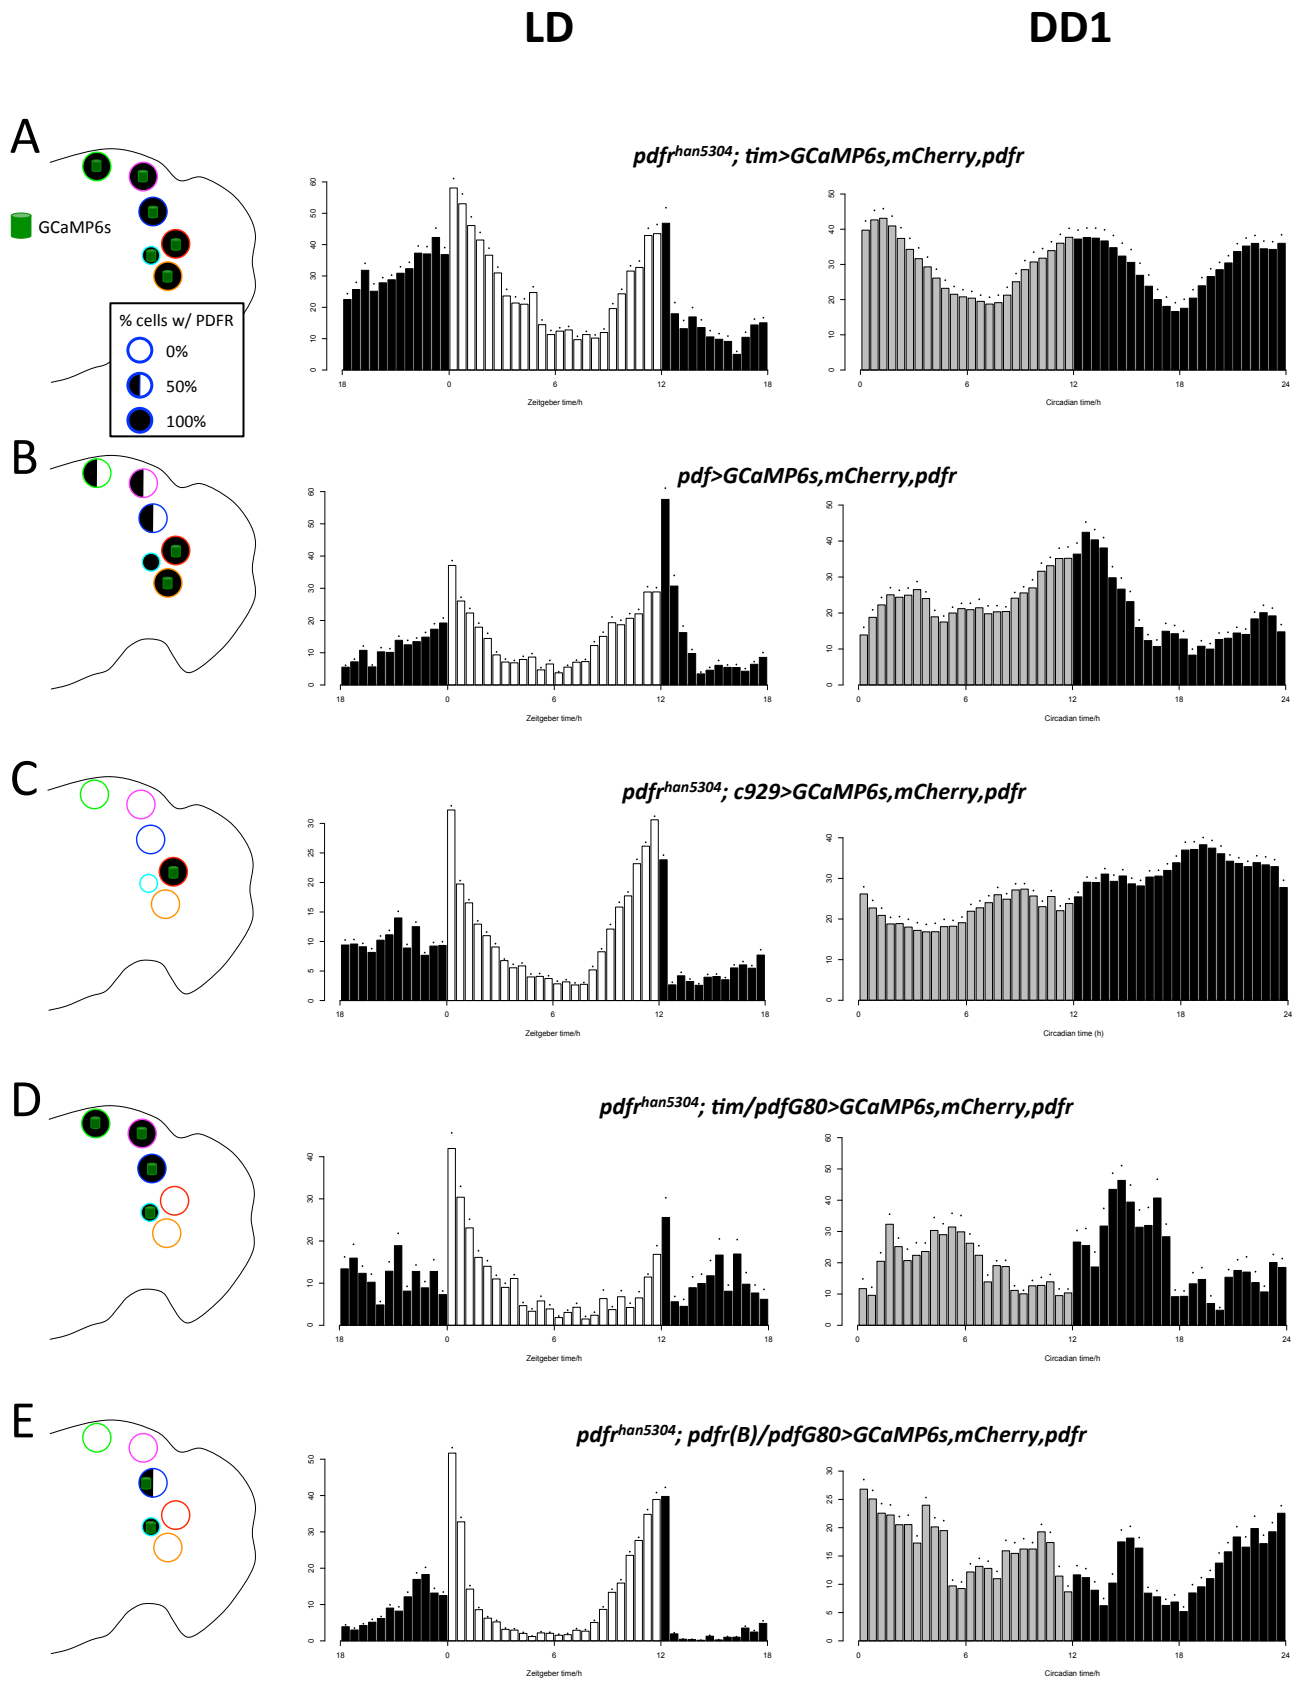

**Figure S2. Behavioral patterns resulting from PDFR gain-of-function experiments.** Related to Figure 4.

(A-E) Average locomotor activity under LD cycles (left) and in first day under DD (right) in the same genotypes which were used for imaging in Figure 4 A-E (also see Table S1).

Fig S3 Related to Figure 5

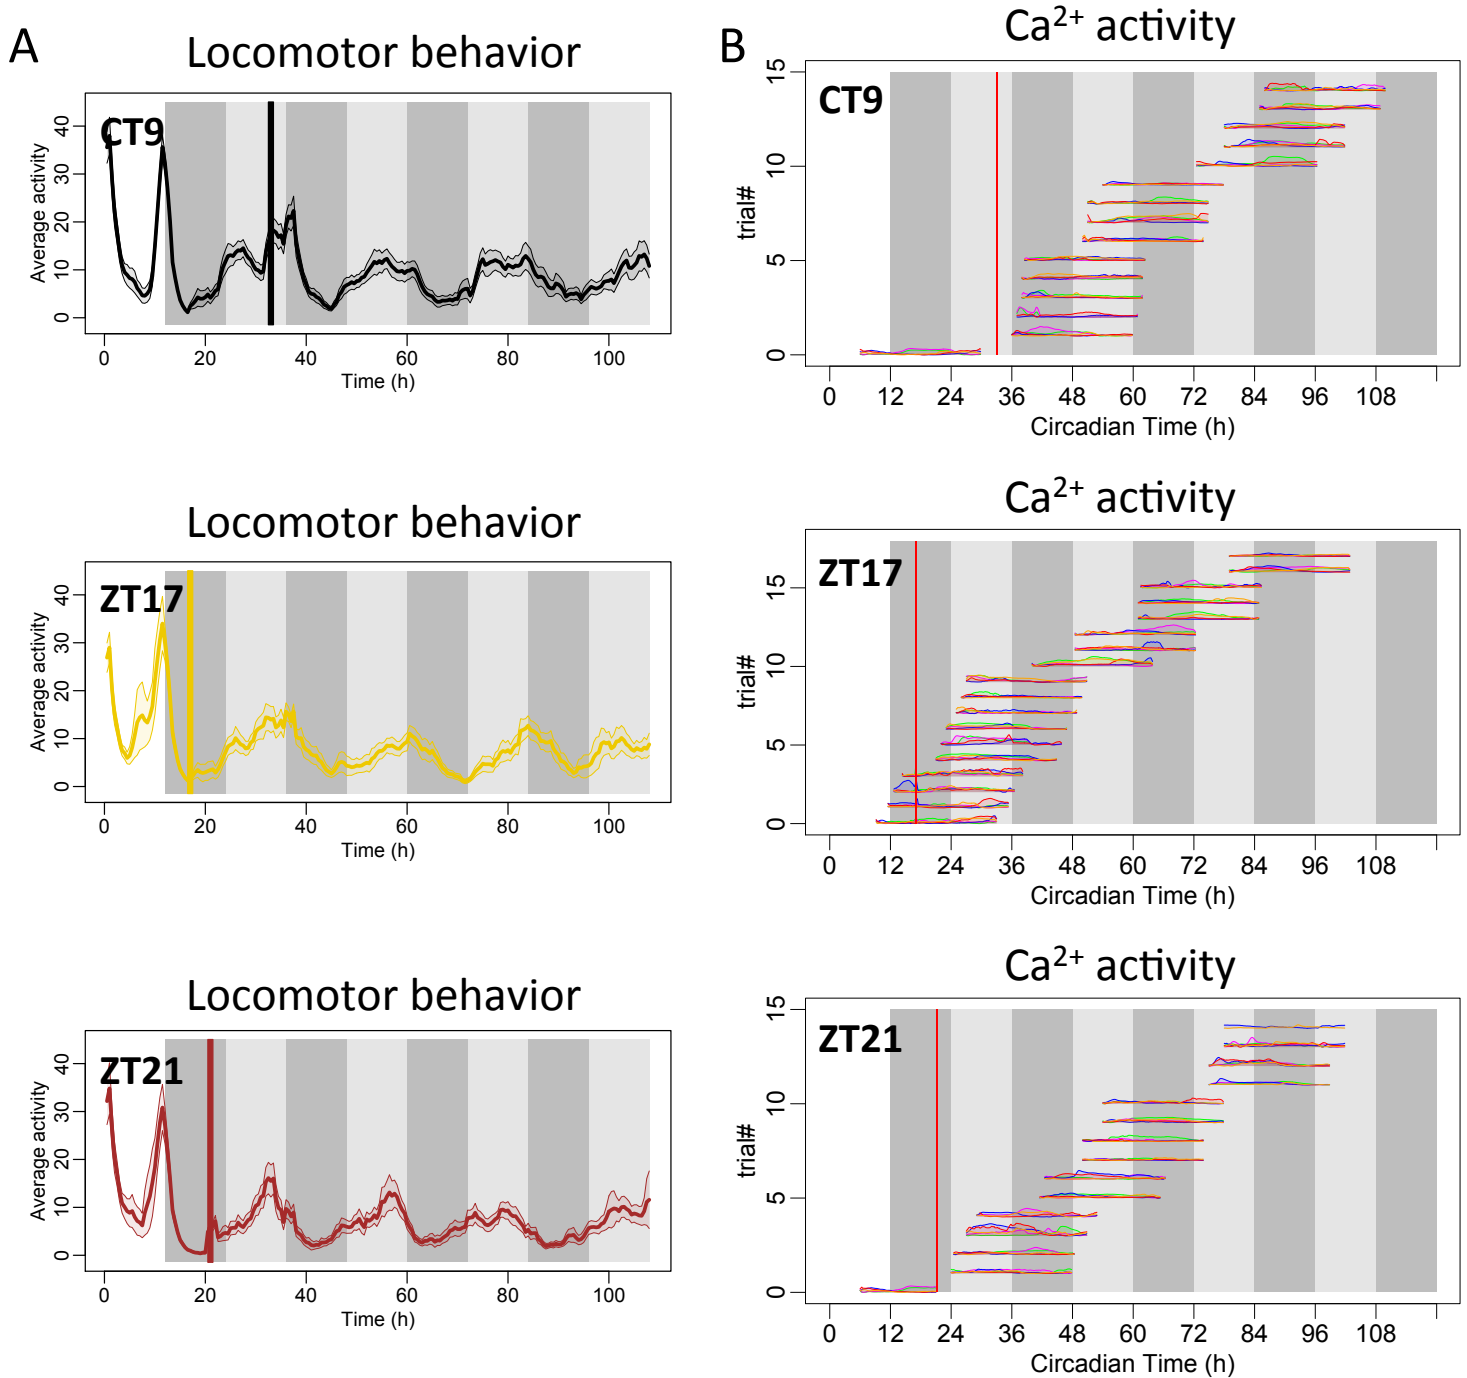

**Figure S3. Behavior and Ca<sup>2+</sup> activity phase-shifts by light pulses.** Related to Figure 5.

(A) Average locomotor activity in the three days following 15 min light pulses delivered either in the dead zone (CT9), or in the phase-delay zone (ZT17), or in the phase-advance zone (ZT21). Bars indicate the time of light pulses. (n= 16 flies).

(B) Ca<sup>2+</sup> activity traces of light pulse experiments. Each line represents a single imaging episode measuring 24 h Ca<sup>2+</sup> transients in the different pacemaker groups in one fly. Group-specific traces were then tiled and averaged to synthesize the three-day patterns in Figure 5A. Red bars indicate the time of light pulses.

Fig S4. Related to Figure 5

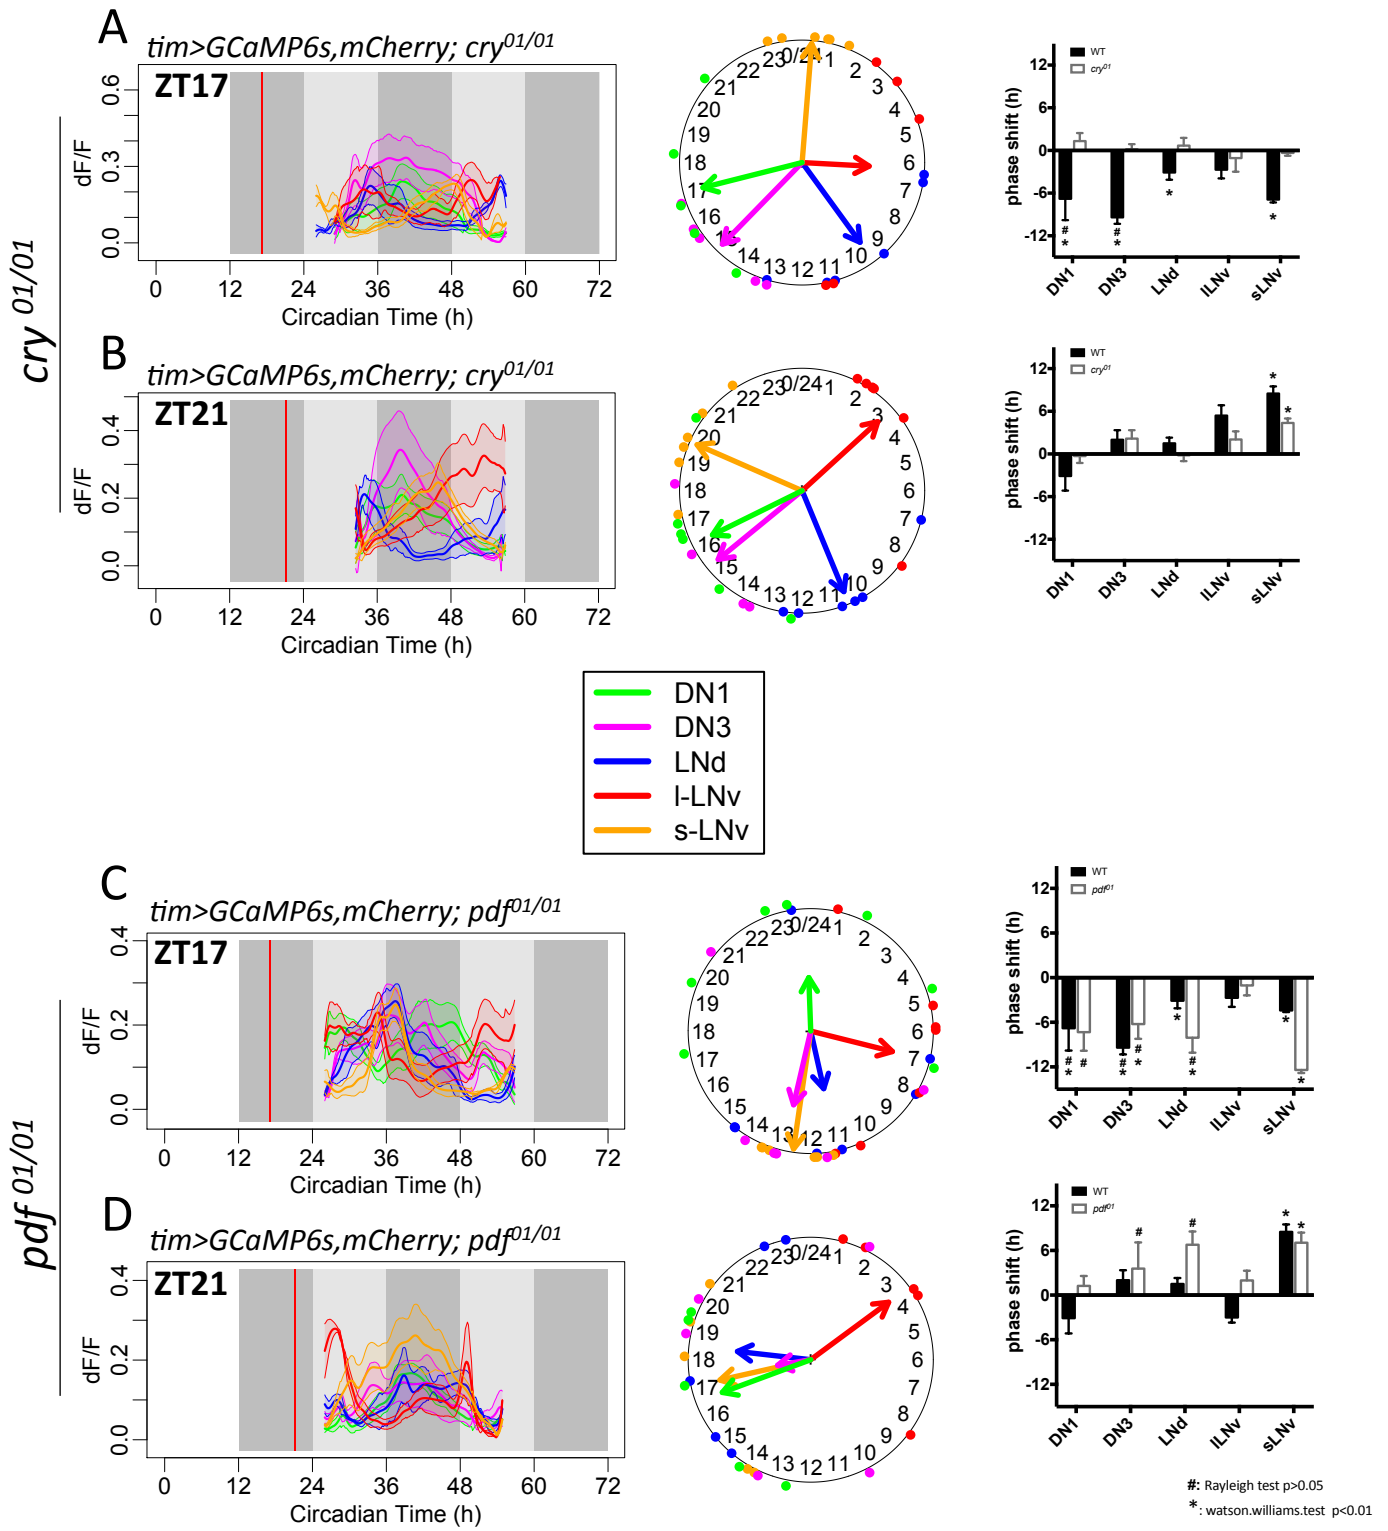

**Figure S4. Light-induced Ca<sup>2+</sup> phase-shifts require CRY and PDF.** Related to Figure 5.

(A-B) Measurements of Ca<sup>2+</sup> phase-shifts in the five major pacemaker groups in *cry<sup>01</sup>* mutants *in vivo*, during the first day after light pulses: (A) in the phase-delay zone (ZT17; n = 6 flies) and (B) in the phase-advance zone (ZT21; n = 6 flies). Left, Ca<sup>2+</sup> transients. Middle, Ca<sup>2+</sup> phase distributions. Right, Ca<sup>2+</sup> phase shifts by light pulses in WT controls (filled bars) and *cry<sup>01</sup>* mutants (empty bars) compared to unstimulated WT controls and *cry<sup>01</sup>* mutants respectively. Hashes (#) denote those groups losing coherence of Ca<sup>2+</sup> activity ( $p > 0.05$ : Rayleigh test). Asterisks denote those groups with significant phase-shifts ( $p < 0.01$ : Watson-Williams test).

(C-D) Measurements of Ca<sup>2+</sup> phase-shifts in the five major pacemaker groups *in vivo* in *pdf<sup>01</sup>* mutants in the first day after light pulses (C) in the phase-delay zone (ZT17; n = 7 flies) and (D) in the phase-advance zone (ZT21; n = 5 flies).

Fig S5. Related to Figure 6

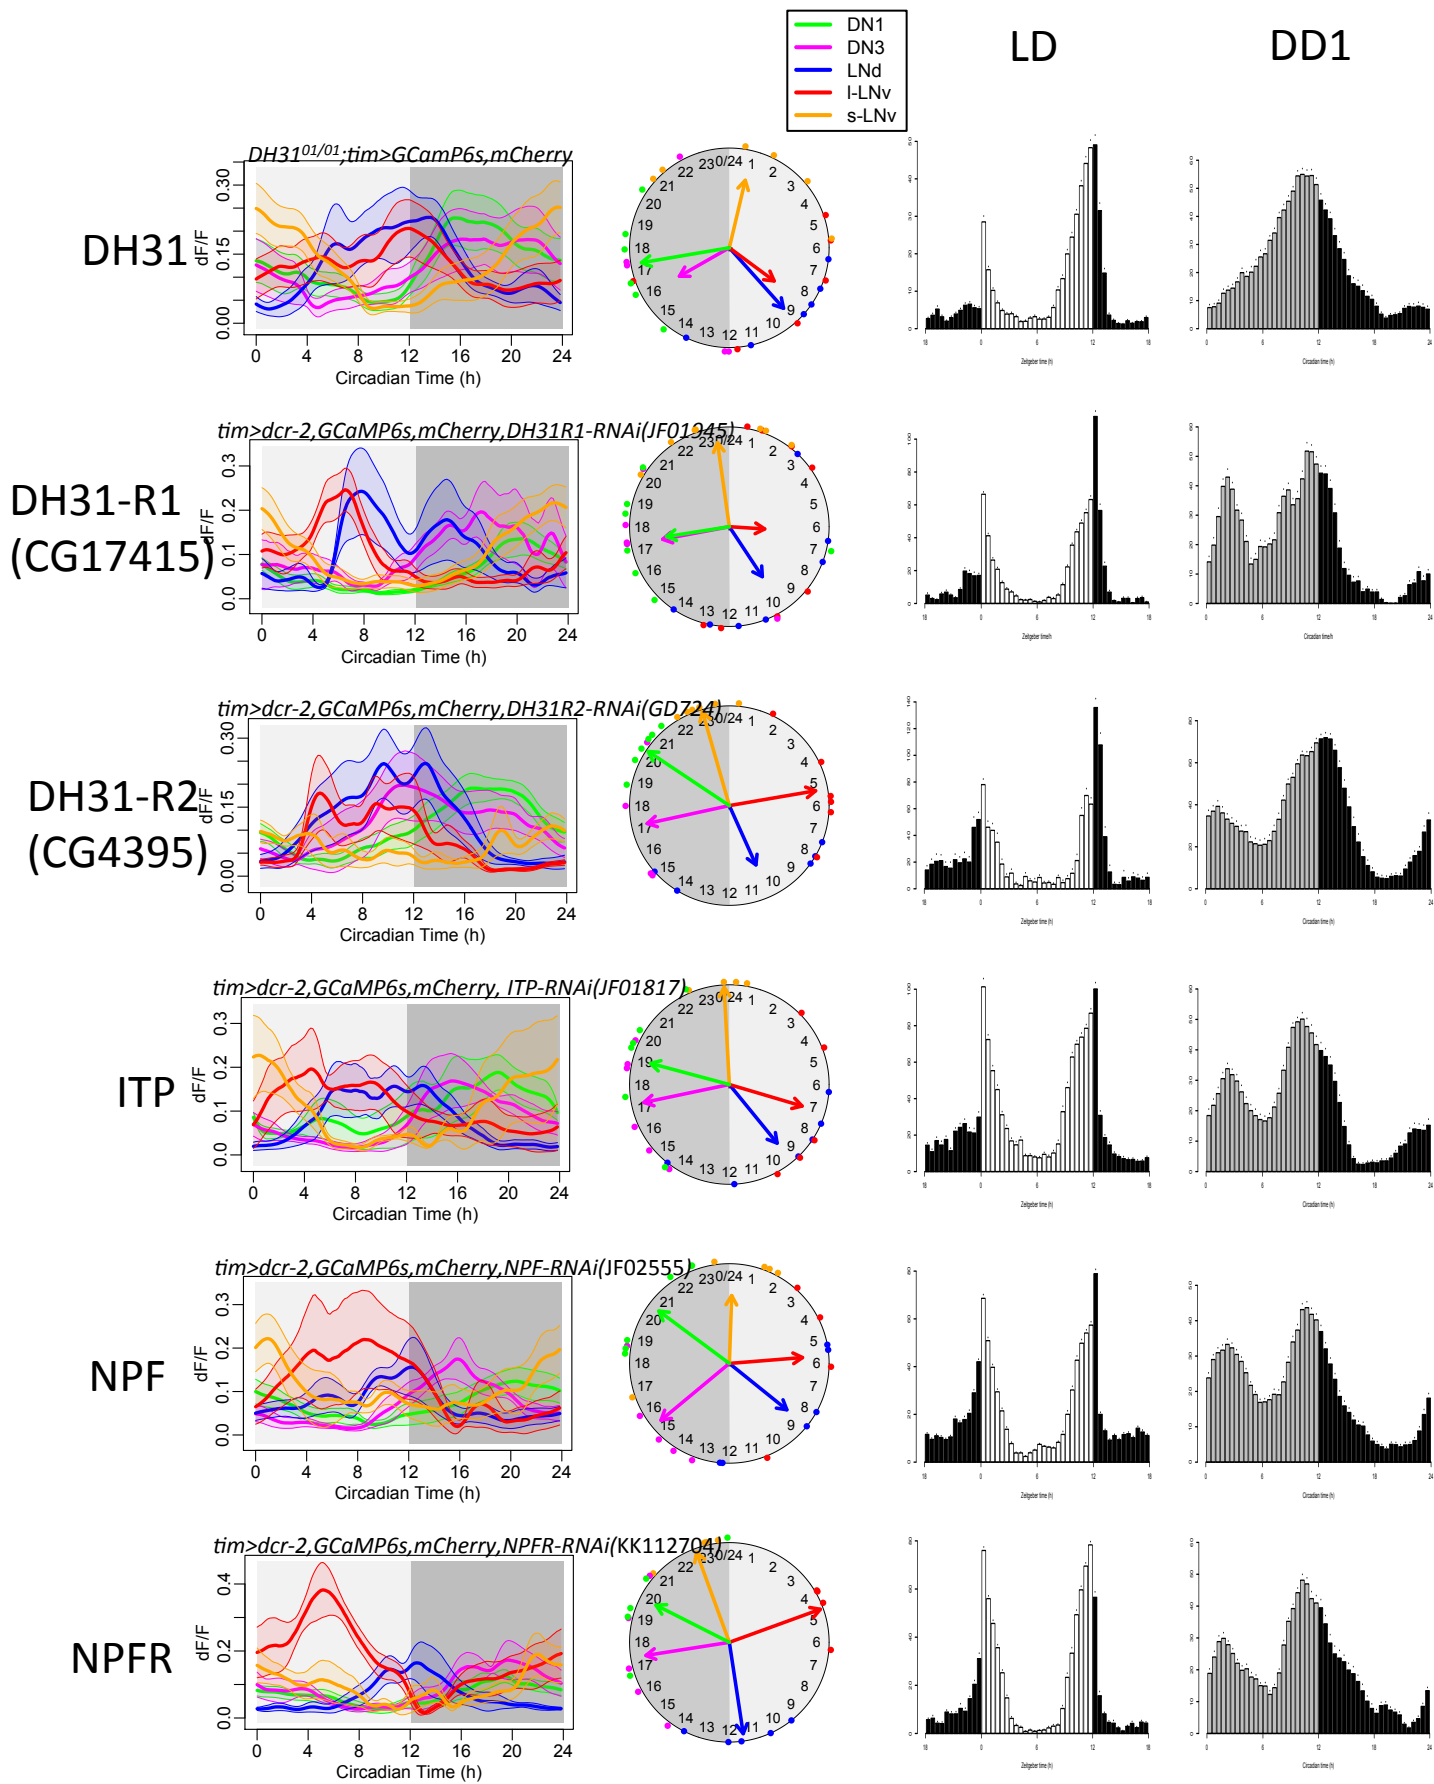

**Figure S5. A screen for neuropeptides and cognate receptors that contribute to wild type patterns of Ca<sup>2+</sup> rhythms.** Related to Figure 6.

(Left) Daily Ca<sup>2+</sup> activity patterns of the five major pacemaker groups under DD in flies with neuropeptide mutants or pan-pacemaker RNAi knockdown of neuropeptides or receptors. Left, average Ca<sup>2+</sup> transients. Right, Ca<sup>2+</sup> phase distributions. (DH31: n = 6 flies; DH31R1: n = 8 flies; DH31R2: n = 7 flies; ITP: n = 6 flies; NPF: n = 6 flies; NPFR: n = 5 flies)

(Right) Average locomotor activity under LD cycles and in first day under DD (DD1) in genotypes that were screened in the left panel (also see Table S1). The absence of a morning activity in *dh31<sup>01</sup>* homozygotes has previously been ascribed to an unrelated genetic background effect (Kunst et al., 2014).



Fig S6. Related to Figure 6

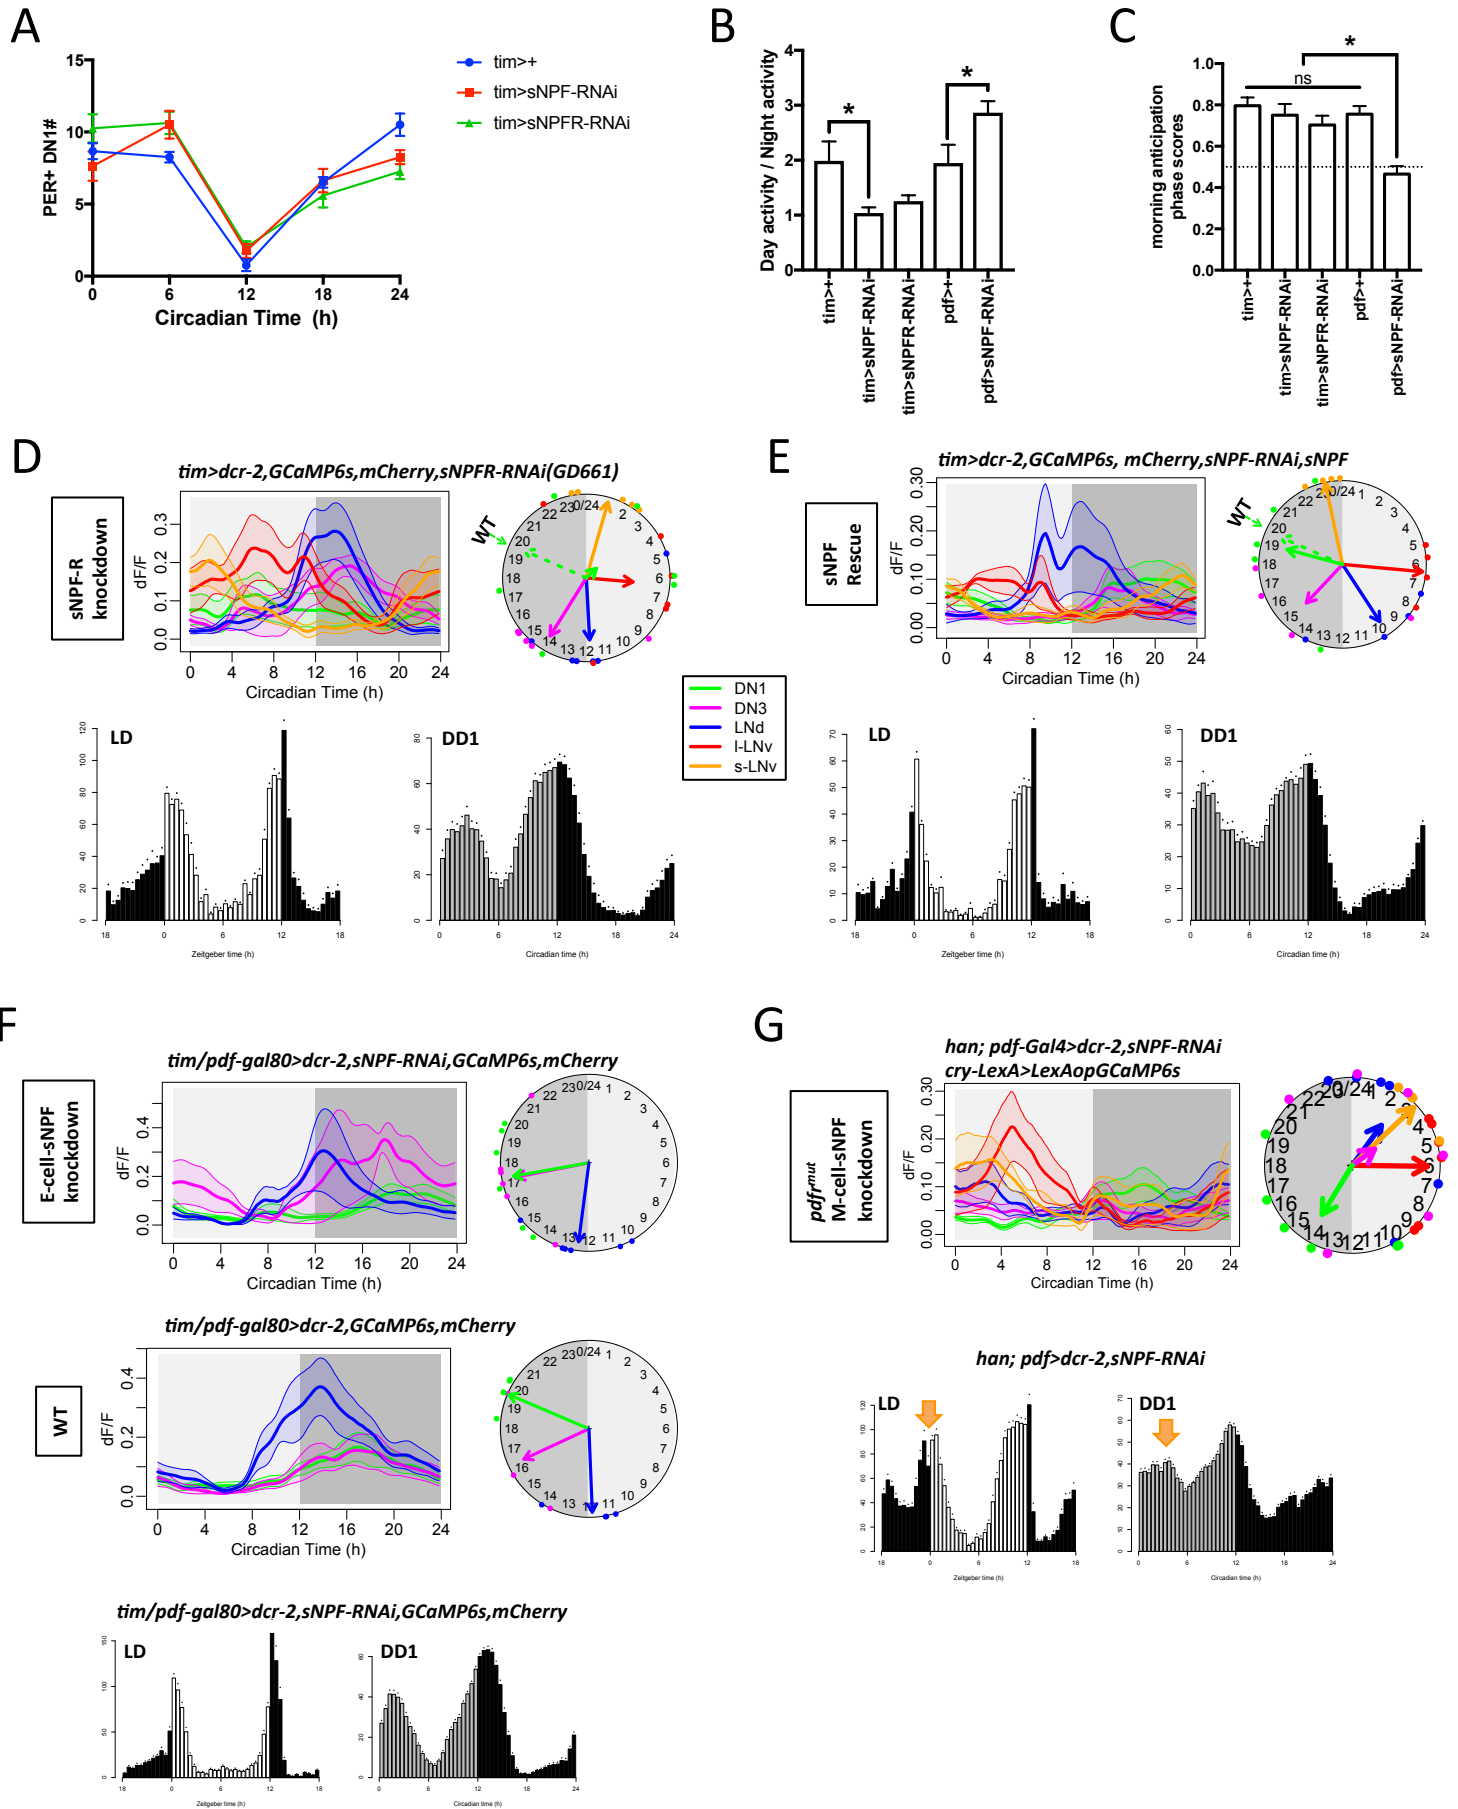

**Figure S6. Additional characterization for the role of sNPF on regulating Ca<sup>2+</sup> activity in DN1 pacemakers.** Related to Figure 6.

(A) PER oscillations in DN1 groups were unaffected by sNPF/sNPF<sub>R</sub> knockdown. Quantifications of PER immunostaining brains from WT controls, pan-pacemaker RNAi knockdown of *sNPF*, and pan-pacemaker RNAi knockdown of *sNPF<sub>R</sub>* flies in first day under DD. PER(+) DN1 neurons were counted in each hemisphere. Error bars denote SEM (n = 6-10 hemispheres per time point). No significant differences were noted between genotypes.

(B) All-pacemaker sNPF knockdown decreases daytime locomotor activity and increases nighttime locomotor activity. M pacemaker sNPF knockdown increases daytime activity and decreases night activity. The amount of locomotor activity during the daytime or nighttime represents averages during a 6-day period under LD (\*p<0.05; Mann-Whitney test). These results confirm previous work by Hermann-Luibl et al. (2014).

(C) M pacemaker sNPF knockdown impairs morning anticipatory behavior. Morning anticipation phase scores in different genotypes of control and sNPF knockdown flies (\*p<0.01; ns, not significant: ANOVA followed by t-test). Scores below the dashed line indicate no anticipation.

(D) Above - Daily Ca<sup>2+</sup> activity patterns in flies with sNPF receptor knockdown in all circadian pacemakers under DD (n = 6 flies), and their daily behavioral patterns under LD (below left) and DD (below right) conditions. WT refers to the peak value of the DN1 Ca<sup>2+</sup> pattern in control flies.

(E) Above - Daily patterns in *tim > sNPF RNAi*, *sNPF* demonstrating full genetic rescue of the coherence and phase of DN1 Ca<sup>2+</sup> activity under DD (n = 5 flies), and their daily behavioral patterns under LD (below left) and DD (below right) conditions.

(F) Daily Ca<sup>2+</sup> activity and behavioral patterns of E-cell-specific sNPF knockdown flies. Average 24 hr Ca<sup>2+</sup> transients (left) and Ca<sup>2+</sup> phase distributions (right) under DD of three circadian pacemaker groups: the E-cell LNd group, the DN3, and DN1. Driven by *tim-gal4/pdf-gal80*, these three groups expressed both the Ca<sup>2+</sup> sensor and *sNPF-RNAi* (above - n = 6 flies) and only the Ca<sup>2+</sup> sensor as WT controls (middle - n = 5 flies). DN1 Ca<sup>2+</sup> activity was rhythmic (p<0.01: Rayleigh test) and displayed a non-significant trend of phase-advance in E-cell-specific sNPF knockdown (p=0.058: Watson-Williams test). (Below) Average locomotor activity under LD cycles (below left) and in first day under DD (below right) in flies with *sNPF* knockdown in E pacemakers, *tim-gal4, pdf-gal80 > sNPF RNAi*.

(G) Morning anticipatory behavior of *pdf<sub>r</sub>* mutants is restored by M-cell-specific sNPF knockdown. (Above) Average Ca<sup>2+</sup> transients (left) and Ca<sup>2+</sup> phase distributions (right) five major pacemaker groups in *pdf<sub>r</sub><sup>han5304</sup>;pdf > sNPF-RNAi* flies in the first day under DD (n = 6 flies). (Below) Average locomotor activity of *pdf<sub>r</sub><sup>han5304</sup>;pdf > sNPF-RNAi* flies under LD cycles (below left) and in first day under DD (below right); also see Table S1). In LD, these flies displayed strong morning anticipatory behavior (orange arrow), which is normally absent in *pdf<sub>r</sub>* mutants (Figure S2A) and in M-cell-specific sNPF knockdown flies (cf. Figure 6H). Note that the phase-advance of evening activity period in LD is not rescued.

# Fig S7. Related to Figure 6

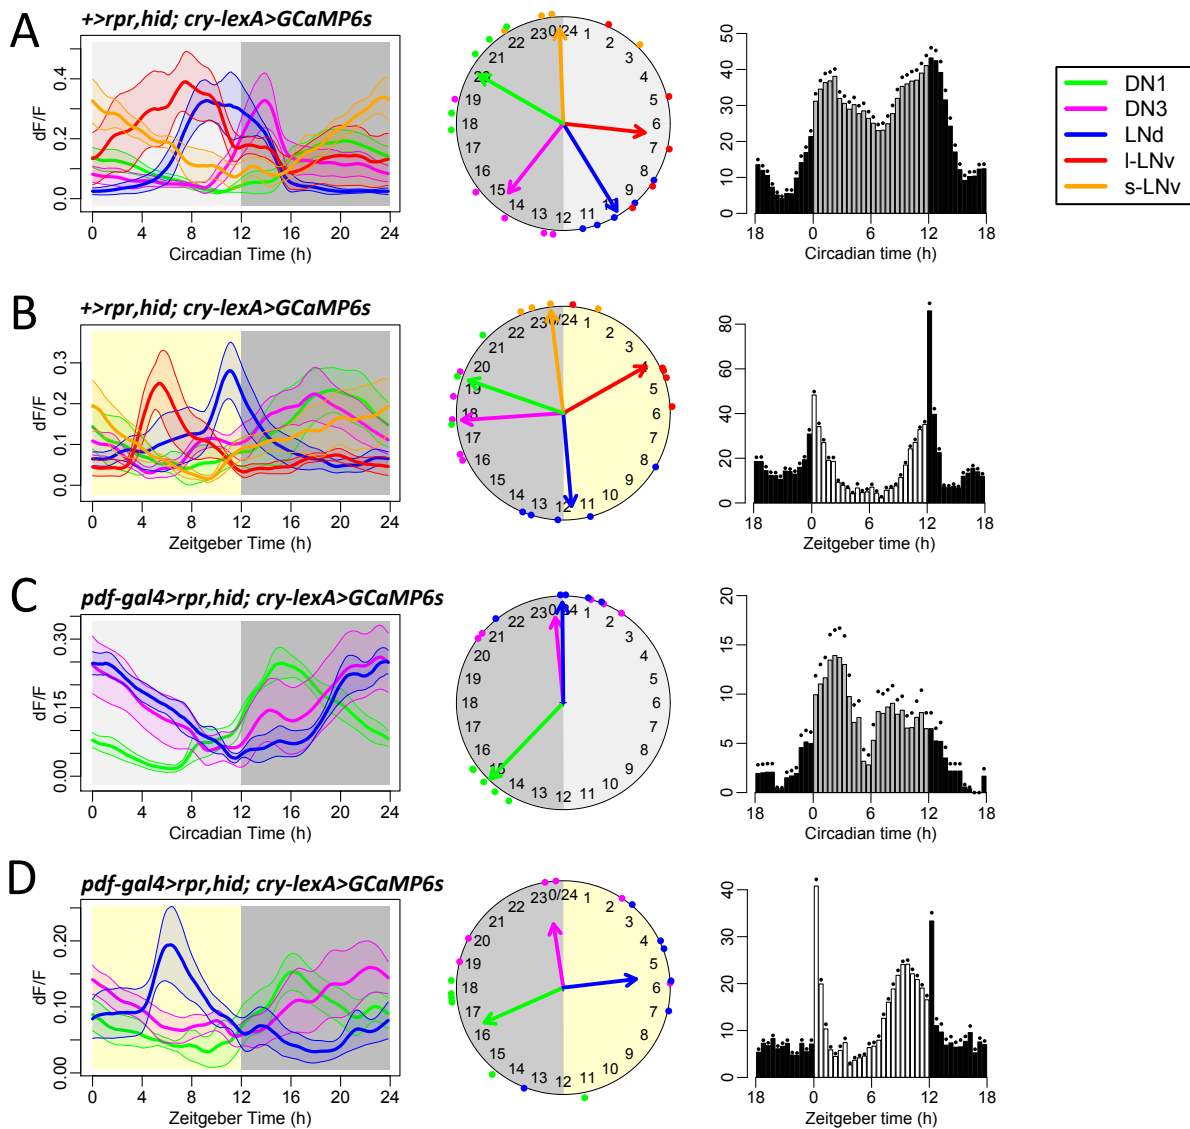

**Figure S7. Daily Ca<sup>2+</sup> activities and behavioral patterns of PDF-cell-ablated flies.** Related to Figure 6. (A-B) Average Ca<sup>2+</sup> transients (left), Ca<sup>2+</sup> phase distributions (middle) and average locomotor activity (right) in WT (no Gal4) controls (A) in the first day under DD (n = 5 flies) and (B) under LD cycles (n = 5 flies). (C-D) The Ca<sup>2+</sup> activity patterns of three PDF-negative pacemaker groups in flies without PDF-positive neurons (s-LNv and I-LNv), and behavioral patterns of *pdf>rpr,hid; cry>GCaMP6s* flies. (C) In DD, compared to controls, LNd and DN3 were phase-shifted to dawn, while DN1 displayed a phase-advance ( $p < 0.01$ : Watson-Williams test; n = 5 flies). (D) In LD, LNd phases were delayed, compared to values in DD, panel C) ( $p < 0.01$ : Watson-Williams test; n = 6 flies); cf. Fig 1B.

Fig S8. Related to Figure 8

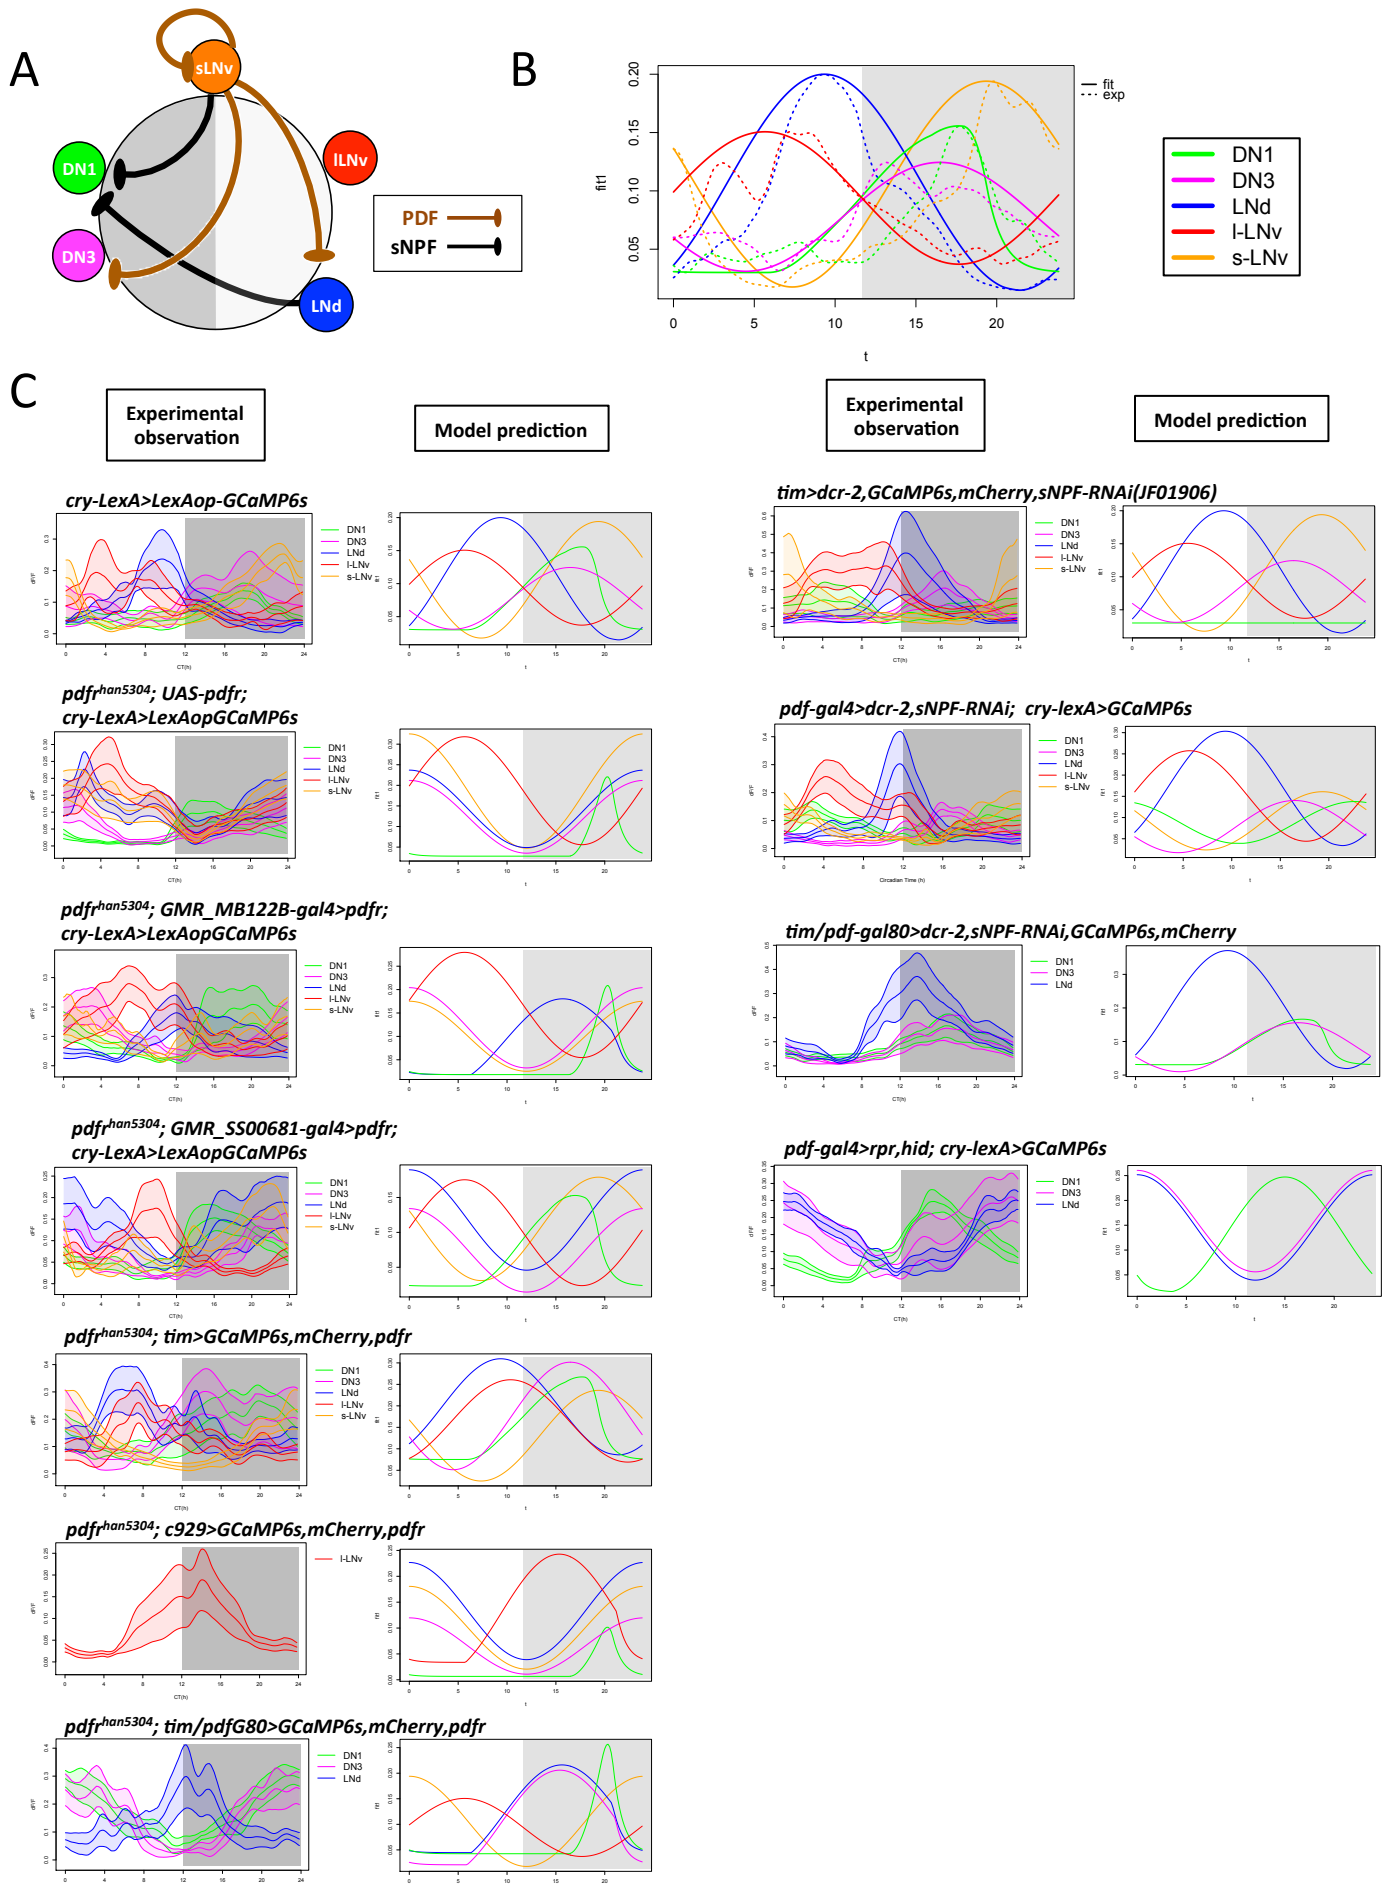

**Figure S8. A quantitative model of oscillators coupled by PDF- and sNPF-mediated suppressions.**

Related to Figure 8.

(A) Schematics of the model: five simple harmonic oscillators represent  $\text{Ca}^{2+}$  rhythms of five major circadian pacemaker groups. These oscillators are coupled by PDF- and sNPF-mediated suppressions. (B)  $\text{Ca}^{2+}$  activity patterns of WT pacemakers (*cry-lexA>GCaMP6s* - dashed lines) were used to fit the model (solid lines). (C) Predictions of the model to removing or to adding neuropeptide-mediated interactions (right) were compared with the experimental observations (left – these are reproduced from earlier Figures).

**Table S1. Summary of Circadian Behavior Rhythms.** Related to Figure 1, 2, 4, and 6 and Figure S1, S2, S5, S6, and S7.

| Genotype                                                | N  | %AR | Period | pwr  | wid | SNR | ACT-day | ACT-night | ACT-cycle | E-phase* (ZT) | SEM |
|---------------------------------------------------------|----|-----|--------|------|-----|-----|---------|-----------|-----------|---------------|-----|
| tim-gal4;uas-GCaMP6s,mCherry                            | 16 | 44% | 24.3   | 29.0 | 3.1 | 0.4 | 12.3    | 8.2       | 10.2      | 12.2          | 0.1 |
| tim-gal4;uas-GCaMP6s;pdf01                              | 14 | 79% | 22.3   | 38.2 | 4.3 | 0.5 | 14.4    | 13.2      | 13.8      | 11.4          | 0.1 |
| han/y;uas-pdf/+;cryLexA,LexAop-GCaMP6s/+                | 16 | 56% | 24.1   | 34.6 | 4.9 | 1.0 | 19.9    | 12.2      | 16.1      | 11.2          | 0.1 |
| han/y;GMRSS00681/uas-pdf;cryLexA,LexAop-GCaMP6s/+       | 15 | 53% | 23.5   | 20.6 | 3.0 | 0.4 | 30.6    | 22.6      | 26.6      | 11.2          | 0.1 |
| han/y;GMRMB122B/uas-pdf;cryLexA,LexAop-GCaMP6s/+        | 8  | 63% | 23.5   | 25.6 | 5.7 | 0.9 | 13.8    | 10.2      | 12.0      | 11.8          | 0.2 |
| han/y;tim-gal4/uas-pdf;uas-GCaMP6s,mCherry/+            | 11 | 36% | 23.6   | 44.8 | 4.0 | 1.6 | 19.2    | 26.2      | 22.7      | 12.6          | 0.4 |
| han/y;pdfgal80/uas-pdf;tim-gal4/uas-GCaMP6s,mCherry     | 12 | 50% | 23.7   | 22.6 | 2.7 | 0.7 | 3.9     | 4.5       | 4.2       | 11.6          | 0.7 |
| han/y;pdf-gal80/uas-pdf;pdf(B)-gal4/uas-GCaMP6s,mCherry | 15 | 40% | 23.8   | 19.1 | 2.5 | 0.4 | 7.7     | 8.7       | 8.2       | 11.2          | 0.2 |
| han/y;c929-gal4/uas-pdf;uas-GCaMP6s,mCherry/+           | 10 | 70% | 23.7   | 6.3  | 1.3 | 0.6 | 12.7    | 10.1      | 11.4      | 11.8          | 0.1 |
| pdf-gal4/uas-pdf;GCaMP6s,mCherry/+                      | 14 | 43% | 24.5   | 37.2 | 4.4 | 0.5 | 15.4    | 12.2      | 13.8      | 12.0          | 0.3 |
| DH31[01];timgal4/uas-GCaMP6s                            | 15 | 7%  | 24.7   | 37.9 | 4.4 | 0.7 | 7.4     | 5.5       | 6.5       | 12.1          | 0.1 |
| dcr2/y;timgal4/+;GCaMP6s,mCherry/CG17415(JF01945)-RNAi  | 15 | 20% | 24.3   | 39.2 | 5.3 | 0.6 | 20.1    | 10.1      | 15.1      | 11.5          | 0.2 |
| dcr2/y;timgal4/+;GCaMP6s,mCherry/GC4395(GD724)-RNAi     | 15 | 0%  | 23.5   | 70.8 | 7.9 | 2.4 | 34.3    | 22.1      | 28.2      | 12.8          | 0.2 |
| dcr2/y;timgal4/ITP(JF01817)-RNAi;GCaMP6s,mCherry/+      | 7  | 0%  | 23.6   | 39.2 | 4.3 | 1.4 | 30.5    | 15.7      | 23.1      | 12.2          | 0.1 |
| dcr2/y;timgal4/+;GCaMP6s,mCherry/NPF(JF02555)-RNAi      | 16 | 6%  | 24.1   | 46.6 | 5.8 | 1.3 | 23.0    | 9.6       | 16.3      | 11.6          | 0.1 |
| dcr2/y;timgal4/+;GCaMP6s,mCherry/NPFR(KK112704)-RNAi    | 14 | 36% | 25.2   | 22.6 | 4.1 | 0.6 | 15.9    | 12.6      | 14.2      | 11.9          | 0.1 |

| Genotype                                                                    | N  | %AR  | Period | pwr  | wid | SNR | ACT-day | ACT-night | ACT-cycle | E-phase(ZT) | SEM |
|-----------------------------------------------------------------------------|----|------|--------|------|-----|-----|---------|-----------|-----------|-------------|-----|
| <b>dcr2/y;tim-gal4/+;GCaMP6s,mCherry/sNPF(JF01906)-RNAi</b>                 | 15 | 0%   | 23.9   | 37.0 | 4.4 | 1.1 | 31.6    | 23.4      | 27.5      | 12.0        | 0.1 |
| <b>pdf-gal4/y;;cry-LexA,LexAop-GCaMP6s</b>                                  | 15 | 27%  | 23.7   | 59.4 | 4.0 | 0.5 | 18.4    | 11.5      | 14.9      | 12.1        | 0.2 |
| <b>pdf-gal4/y;uas-dcr2/+;cry-LexA,LexAop-GCaMP6s/uas-sNPF(JF01906)-RNAi</b> | 32 | 19%  | 23.6   | 24.4 | 3.0 | 0.5 | 18.1    | 8.9       | 13.4      | 10.0        | 0.2 |
| <b>dcr2/y;tim-gal4/+;GCaMP6s,mCherry/sNPF(GD661)-RNAi</b>                   | 22 | 9%   | 23.9   | 55.3 | 6.8 | 1.7 | 36.6    | 19.8      | 28.2      | 11.9        | 0.2 |
| <b>dcr2/y;tim-gal4/sNPF;GCaMP6s,mCherry/+</b>                               | 7  | 29%  | 24.5   | 51.4 | 4.6 | 0.7 | 28.8    | 16.6      | 22.7      | 11.7        | 0.2 |
| <b>dcr2/y;tim-gal4/sNPF;GCaMP6s,mCherry/sNPF(JF01906)-RNAi</b>              | 8  | 25%  | 24.3   | 55.9 | 4.6 | 0.6 | 23.9    | 13.9      | 18.9      | 11.6        | 0.1 |
| <b>han, pdf-gal4/y;uas-dcr2/+;uas-sNPF(JF01906)-RNAi/+</b>                  | 28 | 57%  | 23.4   | 16.9 | 2.7 | 0.4 | 43.1    | 30.8      | 36.9      | 11.4        | 0.1 |
| <b>uas-dcr2/pdf-gal80;tim-gal4,uas-GCaMP6s/uas-sNPF(JF01906)-RNAi</b>       | 16 | 19%  | 23.6   | 66.0 | 3.8 | 0.9 | 17.4    | 8.9       | 13.1      | 12.1        | 0.1 |
| <b>uas-rpr/y;;cry-LexA,LexAop-GCaMP6s</b>                                   | 14 | 7%   | 23.8   | 64.3 | 4.2 | 0.8 | 23.1    | 11.1      | 17.1      | 12.4        | 0.2 |
| <b>uas-rpr,hid;pdf-gal4;cry-LexA,LexAop-GCaMP6s</b>                         | 12 | 100% | NA     | 4.8  | 1.0 | 0.5 | 7.0     | 7.5       | 7.2       | 10.1        | 0.2 |

\* E-phases and SEM are calculated from behavior in LD cycles. The E-phases are given in Zeitgeber time (ZT), in which the average evening peak fell; SEM represents fly-to-fly variability within a given genotype. The rest of values are calculated from nine-day records of behaviour in DD.
